# Supplementary material
Source: publisher figshare collection journal article supplement (https://gsapubs.figshare.com/ndownloader/files/26669579)
Supplement: Supplementary file 1 [file 26669579]

## Sheet: Cu_Liver
Supplementary Data 4. Multi-channel analysis fit values for each analysed region.
Fitting Region	Cu_1_liver
Fit Min Bin	250
Fit Max Bin	1000
Peaks	start	error +/-
Short Tail Area	0.06	0.03
Short Tail |Slope	0.5	0.49
Long Tail Area	0.022	0.015
Long Tail slope	10	7
Background
Type	SNIP
SNIP Background Width	50
Strip Background Width	1
Strip Background Interations	20000
Detector	start	error +/-	best fit	error +/-
Spectometer Zero (eV)	-21.9568	100	4.47629	100
Spectometer Gain (eV/bin)	10.1545	1	10.0039	1
Detector Width (eV)	150	50	115.125	50
Fano Factor	0.114	0.114	0.119558	0.114
PileUp Factor	1e-08	1e-08	-1.53224e-09	1e-08
Fitting Region	Cu_2_liver
Fit Min Bin	250
Fit Max Bin	1000
Peaks	start	error +/-
Short Tail Area	0.06	0.03
Short Tail |Slope	0.5	0.49
Long Tail Area	0.022	0.015
Long Tail slope	10	7
Background
Type	SNIP
SNIP Background Width	50
Strip Background Width	1
Strip Background Interations	20000
Detector	start	error +/-	best fit	error +/-
Spectometer Zero (eV)	-21.9568	100	-0.398264	100
Spectometer Gain (eV/bin)	10.1545	1	10.0109	1
Detector Width (eV)	150	50	117.965	50
Fano Factor	0.114	0.114	0.119598	0.114
PileUp Factor	1e-08	1e-08	9.07523e-09	1e-08
Fitting Region	Cu_3_liver
Fit Min Bin	250
Fit Max Bin	1000
Peaks	start	error +/-
Short Tail Area	0.06	0.03
Short Tail |Slope	0.5	0.49
Long Tail Area	0.022	0.015
Long Tail slope	10	7
Background
Type	SNIP
SNIP Background Width	50
Strip Background Width	1
Strip Background Interations	20000
Detector	start	error +/-	best fit	error +/-
Spectometer Zero (eV)	-21.9568	100	-3.72487	100
Spectometer Gain (eV/bin)	10.1545	1	10.0138	1
Detector Width (eV)	150	50	102.98	50
Fano Factor	0.114	0.114	0.114448	0.114
PileUp Factor	1e-08	1e-08	1.09069e-08	1e-08

## Sheet: Cu_skin
Supplementary Data 4. Multi-channel analysis fit values for each analysed region.
Fitting Region	Cu_1_skin
Fit Min Bin	250
Fit Max Bin	1000
Peaks	start	error +/-
Short Tail Area	0.06	0.03
Short Tail |Slope	0.5	0.49
Long Tail Area	0.022	0.015
Long Tail slope	10	7
Background
Type	SNIP
SNIP Background Width	50
Strip Background Width	1
Strip Background Interations	20000
Detector	start	error +/-	best fit	error +/-
Spectometer Zero (eV)	-21.9568	100	-4.92319	100
Spectometer Gain (eV/bin)	10.1545	1	10.0155	1
Detector Width (eV)	150	50	111.312	50
Fano Factor	0.114	0.114	0.109358	0.114
PileUp Factor	1e-08	1e-08	1.19955e-08	1e-08
Fitting Region	Cu_2_skin
Fit Min Bin	250
Fit Max Bin	1000
Peaks	start	error +/-
Short Tail Area	0.06	0.03
Short Tail |Slope	0.5	0.49
Long Tail Area	0.022	0.015
Long Tail slope	10	7
Background
Type	SNIP
SNIP Background Width	50
Strip Background Width	1
Strip Background Interations	20000
Detector	start	error +/-	best fit	error +/-
Spectometer Zero (eV)	-21.9568	100	-2.70705	100
Spectometer Gain (eV/bin)	10.1545	1	10.0132	1
Detector Width (eV)	150	50	112.977	50
Fano Factor	0.114	0.114	0.138511	0.114
PileUp Factor	1e-08	1e-08	-7.12118e-09	1e-08
Fitting Region	Cu_3_skin
Fit Min Bin	250
Fit Max Bin	1000
Peaks	start	error +/-
Short Tail Area	0.06	0.03
Short Tail |Slope	0.5	0.49
Long Tail Area	0.022	0.015
Long Tail slope	10	7
Background
Type	SNIP
SNIP Background Width	50
Strip Background Width	1
Strip Background Interations	20000
Detector	start	error +/-	best fit	error +/-
Spectometer Zero (eV)	-21.9568	100	3.65981	100
Spectometer Gain (eV/bin)	10.1545	1	10.003	1
Detector Width (eV)	150	50	103.842	50
Fano Factor	0.114	0.114	0.144022	0.114
PileUp Factor	1e-08	1e-08	2.27545e-08	1e-08

## Sheet: DD_liver
Supplementary Data 4. Multi-channel analysis fit values for each analysed region.
Fitting Region	DD_1_liver
Fit Min Bin	250
Fit Max Bin	1000
Peaks	start	error +/-
Short Tail Area	0.06	0.03
Short Tail |Slope	0.5	0.49
Long Tail Area	0.022	0.015
Long Tail slope	10	7
Background
Type	SNIP
SNIP Background Width	50
Strip Background Width	1
Strip Background Interations	20000
Detector	start	error +/-	best fit	error +/-
Spectometer Zero (eV)	-21.9568	100	-0.325734	100
Spectometer Gain (eV/bin)	10.1545	1	10.0129	1
Detector Width (eV)	150	50	118.333	50
Fano Factor	0.114	0.114	0.17808	0.114
PileUp Factor	1e-08	1e-08	-5.28168e-09	1e-08
Fitting Region	DD_2_liver
Fit Min Bin	250
Fit Max Bin	1000
Peaks	start	error +/-
Short Tail Area	0.06	0.03
Short Tail |Slope	0.5	0.49
Long Tail Area	0.022	0.015
Long Tail slope	10	7
Background
Type	SNIP
SNIP Background Width	50
Strip Background Width	1
Strip Background Interations	20000
Detector	start	error +/-	best fit	error +/-
Spectometer Zero (eV)	-21.9568	100	-5.71944	100
Spectometer Gain (eV/bin)	10.1545	1	10.0172	1
Detector Width (eV)	150	50	88.791	50
Fano Factor	0.114	0.114	0.144855	0.114
PileUp Factor	1e-08	1e-08	1.91364e-08	1e-08
Fitting Region	DD_3_liver
Fit Min Bin	250
Fit Max Bin	1000
Peaks	start	error +/-
Short Tail Area	0.06	0.03
Short Tail |Slope	0.5	0.49
Long Tail Area	0.022	0.015
Long Tail slope	10	7
Background
Type	SNIP
SNIP Background Width	50
Strip Background Width	1
Strip Background Interations	20000
Detector	start	error +/-	best fit	error +/-
Spectometer Zero (eV)	-21.9568	100	-2.65556	100
Spectometer Gain (eV/bin)	10.1545	1	10.0134	1
Detector Width (eV)	150	50	100.586	50
Fano Factor	0.114	0.114	0.108678	0.114
PileUp Factor	1e-08	1e-08	2.1286e-08	1e-08

## Sheet: DD_skin
Supplementary Data 4. Multi-channel analysis fit values for each analysed region.
Fitting Region	DD_1_skin
Fit Min Bin	250
Fit Max Bin	1000
Peaks	start	error +/-
Short Tail Area	0.06	0.03
Short Tail |Slope	0.5	0.49
Long Tail Area	0.022	0.015
Long Tail slope	10	7
Background
Type	SNIP
SNIP Background Width	50
Strip Background Width	1
Strip Background Interations	20000
Detector	start	error +/-	best fit	error +/-
Spectometer Zero (eV)	-21.9568	100	-6.83328	100
Spectometer Gain (eV/bin)	10.1545	1	10.0176	1
Detector Width (eV)	150	50	96.9798	50
Fano Factor	0.114	0.114	0.110732	0.114
PileUp Factor	1e-08	1e-08	2.81813e-08	1e-08
Fitting Region	DD_2_skin
Fit Min Bin	250
Fit Max Bin	1000
Peaks	start	error +/-
Short Tail Area	0.06	0.03
Short Tail |Slope	0.5	0.49
Long Tail Area	0.022	0.015
Long Tail slope	10	7
Background
Type	SNIP
SNIP Background Width	50
Strip Background Width	1
Strip Background Interations	20000
Detector	start	error +/-	best fit	error +/-
Spectometer Zero (eV)	-21.9568	100	-8.69457	100
Spectometer Gain (eV/bin)	10.1545	1	10.0216	1
Detector Width (eV)	150	50	83.5408	50
Fano Factor	0.114	0.114	0.137401	0.114
PileUp Factor	1e-08	1e-08	2.19331e-08	1e-08
Fitting Region	DD_3_skin
Fit Min Bin	250
Fit Max Bin	1000
Peaks	start	error +/-
Short Tail Area	0.06	0.03
Short Tail |Slope	0.5	0.49
Long Tail Area	0.022	0.015
Long Tail slope	10	7
Background
Type	SNIP
SNIP Background Width	50
Strip Background Width	1
Strip Background Interations	20000
Detector	start	error +/-	best fit	error +/-
Spectometer Zero (eV)	-21.9568	100	-2.47438	100
Spectometer Gain (eV/bin)	10.1545	1	10.0101	1
Detector Width (eV)	150	50	108.257	50
Fano Factor	0.114	0.114	0.10002	0.114
PileUp Factor	1e-08	1e-08	1.0835e-08	1e-08

## Sheet: Untreated
Supplementary Data 4. Multi-channel analysis fit values for each analysed region.
Fitting Region	untreated_skin
Fit Min Bin	250
Fit Max Bin	1000
Peaks	start	error +/-
Short Tail Area	0.06	0.03
Short Tail |Slope	0.5	0.49
Long Tail Area	0.022	0.015
Long Tail slope	10	7
Background
Type	SNIP
SNIP Background Width	50
Strip Background Width	1
Strip Background Interations	20000
Detector	start	error +/-	best fit	error +/-
Spectometer Zero (eV)	-21.9568	100	-4.04226	100
Spectometer Gain (eV/bin)	10.1545	1	10.0129	1
Detector Width (eV)	150	50	113.648	50
Fano Factor	0.114	0.114	0.133889	0.114
PileUp Factor	1e-08	1e-08	2.21869e-08	1e-08
Fitting Region	untreated_liver
Fit Min Bin	250
Fit Max Bin	1000
Peaks	start	error +/-
Short Tail Area	0.06	0.03
Short Tail |Slope	0.5	0.49
Long Tail Area	0.022	0.015
Long Tail slope	10	7
Background
Type	SNIP
SNIP Background Width	50
Strip Background Width	1
Strip Background Interations	20000
Detector	start	error +/-	best fit	error +/-
Spectometer Zero (eV)	-21.9568	100	-1.60892	100
Spectometer Gain (eV/bin)	10.1545	1	10.0133	1
Detector Width (eV)	150	50	184.248	50
Fano Factor	0.114	0.114	0.0172629	0.114
PileUp Factor	1e-08	1e-08	8.02774e-09	1e-08

## Sheet: G48696
Rossi, V., Webb, S.M., and McNamara, M., 2021, Maturation experiments reveal bias in the chemistry of fossil melanosomes: Geology, v. 49, https://doi.org/10.1130/G48696.1
